# Supplementary material for: Tailoring mixed-valence CoIII/FeII complexes for their potential use as sensitizers in dye sensitized solar cells
Source: Royal Society of Chemistry journal article supplement (doi:10.1039/b716855a), 2008-01-01
Supplement: b716855a.pdf [file b716855a.pdf]

## **TAILORING MIXED-VALENCE Co<sup>III</sup>/Fe<sup>II</sup> COMPLEXES FOR THEIR POTENTIAL USE AS SENSITIZERS IN Dye Sensitized Solar Cells.**

*Paul V. Bernhardt,<sup>a</sup> Gerrit K. Boschloo,<sup>b</sup> Fernando Bozoglian,<sup>c</sup> Anders Hagfeldt,<sup>b</sup> Manuel Martínez,<sup>c</sup>  
and Beatriz Sienra.<sup>d</sup>*

<sup>a</sup> Department of Chemistry, University of Queensland, Brisbane 4072, AUSTRALIA

<sup>b</sup> Department of Physical Chemistry, Kungliga Tekniska högskolan, Teknikringen 36, S-10044  
Stockholm, SWEDEN

<sup>c</sup> Departament de Química Inorgànica, Universitat de Barcelona, Martí i Franquès 1-11, E-08028  
Barcelona, SPAIN

<sup>d</sup> Cátedra de Química Inorgánica, Facultad de Química, Universidad de la República, Avenida  
General Flores 2124, 11800 Montevideo, URUGUAY

---

### **Supplementary information**

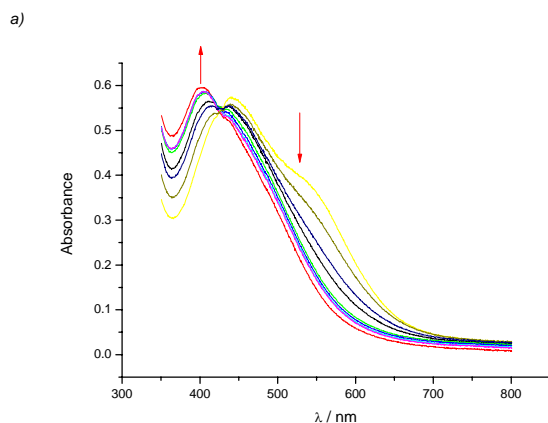

**Figure S1.-** UV-Vis spectral changes on addition of solid  $\text{Na}_2\text{S}_2\text{O}_8$  to a *ca.*  $5 \times 10^{-4}$  M solution in water of  $[\{trans\text{-}L_{14}\text{COOCo}^{\text{III}}(\mu\text{-NC})\}\text{Fe}^{\text{II}}(\text{CN})_5]^{2-}$ .

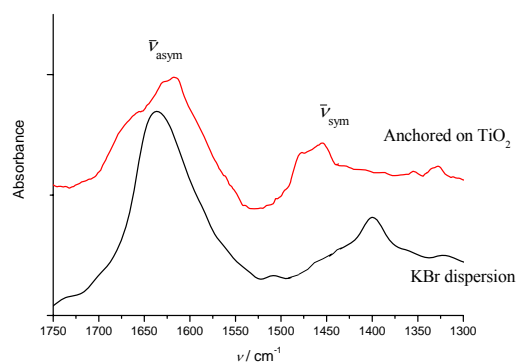

**Figure S2.-** IR spectra of the complex species  $[\{trans\text{-}L_{14}\text{COOCo}^{\text{III}}(\mu\text{-NC})\}\text{Fe}^{\text{II}}(\text{CN})_5]^{2-}$  dispersed in KBr and anchored of mesoporous  $\text{TiO}_2$ .

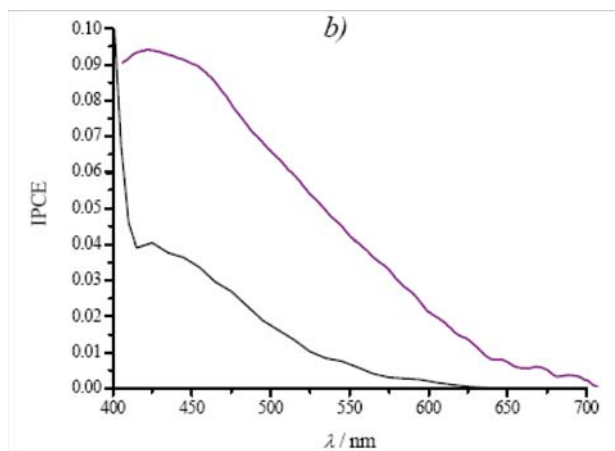

**Figure S3.-** Comparison of the IPCE curve of a complete solar cell build on mesoporous  $\text{TiO}_2$  electrodes using  $[\{trans\text{-}L_{14}\text{COOCo}^{\text{III}}(\mu\text{-NC})\}\text{Fe}^{\text{II}}(\text{CN})_5]^{2-}$  as sensitizer (below) and the visible spectrum of the sensitizer on the same surface (above).
